# Supplementary material for: Paradigmatic De Novo GRIN1 Variants Recapitulate Pathophysiological Mechanisms Underlying GRIN1-Related Disorder Clinical Spectrum
Source: MDPI journal article supplement (doi:10.3390/ijms222312656), 2021-11-23
Supplement: s1 [file s1]

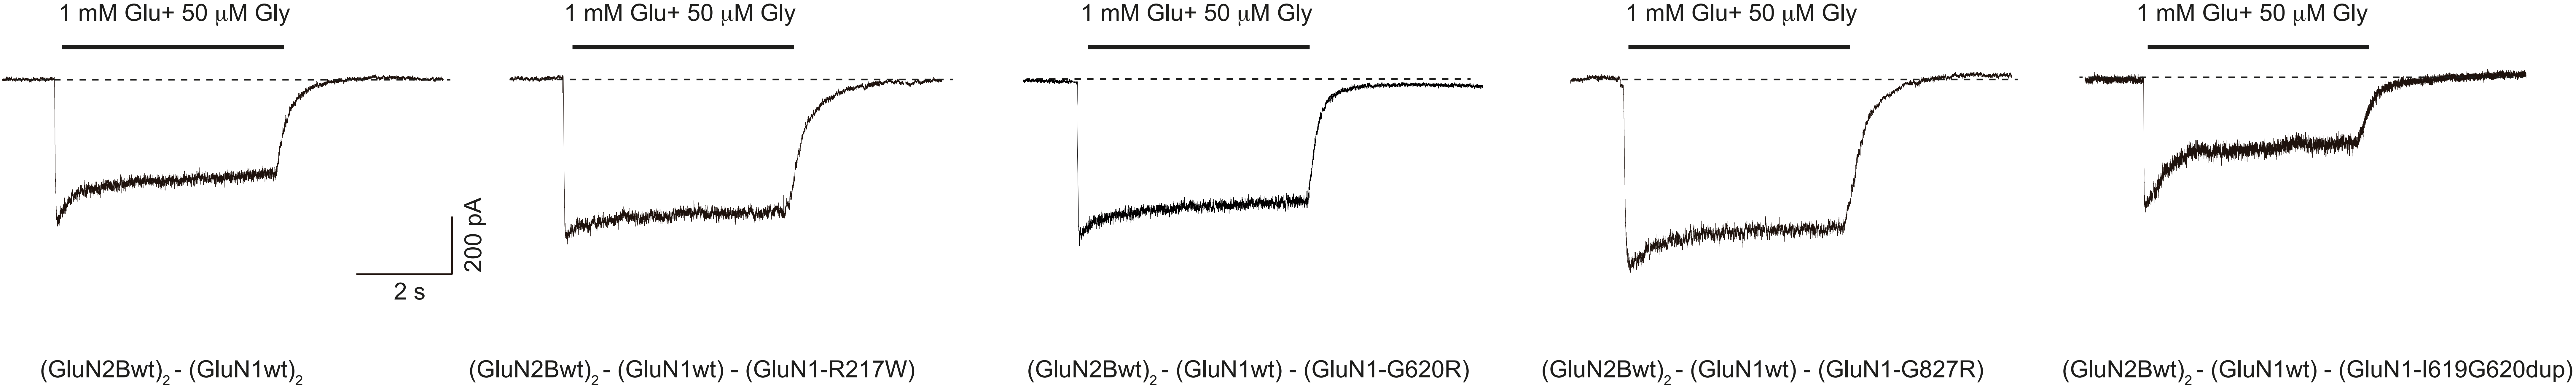

| <i>GRIN</i> variant                   | I <sub>peak</sub> (-pA) | Normalised current density<br>(pA/pF) | Desensitization rate<br>(msec) | Steady state (%)            | Deactivation rate<br>(msec) | Surface expression (%)  |
|---------------------------------------|-------------------------|---------------------------------------|--------------------------------|-----------------------------|-----------------------------|-------------------------|
| (GluN2B) 2 - (GluN1wt) 2              | 436.9 ± 126 (N=15)      | 36.38 ± 5.9 (N=14)                    | 1.12 ± 0.3 (N=5)               | 62.77 ± 3.9 (N=13)          | 0.38 ± 0.04 (N=4)           | 100 ± 2.4 (N=81)        |
| (GluN2B) 2 - (GluN1-R217W / wt)       | 213.8 ± 47.9 (N=15) ns  | 20.33 ± 5.2 (N=16) ns                 | 3.168 ± 1.4 (N=5) ns           | 72.48 ± 2.9 (N=16) ns       | 0.5243 ± 0.05 (N=7) ns      | 88.34 ± 4.422 (N=25) ns |
| (GluN2B) 2 - (GluN1-I619G620dup / wt) | 597.3 ± 244.5 (N=7) ns  | 56.96 ± 24.4 (N=7) ns                 | 0.80 ± 0.4 (N=2) ns            | 69.57 ± 2.5 (N=4) ns        | 0.51 ± 0.09 (N=4) ns        | 106.5 ± 6.224 (N=23) ns |
| (GluN2B) 2 - (GluN1-G620R / wt)       | 269.3 ± 63.6 (N=8) ns   | 23.61 ± 3.5 (N=8) ns                  | N.A.                           | N.A.                        | N.A.                        | N.A.                    |
| (GluN2B) 2 - (GluN1-G827R / wt)       | 401 ± 104 (N=5) ns      | 43.8 ± 20.7 (N=5) ns                  | 0.81 ± 0.09 (N=2) ns           | <b>81.6 ± 2.1 (N=5) ***</b> | 0.48 ± 0.05 (N=2) ns        | 78.95 ± 4.78 (N=24) ns  |

Supplementary Figure S1: Electrophysiological characterisation of NMDAR-mediated currents in HEK-293T heterologously expressing disease-associated GRIN1-DNVs
